# Supplementary material for: Lung cancer costs by treatment strategy and phase of care among patients enrolled in Medicare
Source: PubMed Central journal article supplement (PMC6346221; doi:10.1002/cam4.1896), 2018-12-21
Supplement: CAM4-8-94-s002.pdf [file CAM4-8-94-s002.pdf]

# **B: Supplementary Results**

## **Appendix**

Sheehan et al. 2018

# Contents

---

- Page 3** – **Supplementary Figure B.1:** Average monthly costs 15 months prediagnosis to 6 months postdiagnosis
- Page 4** – **Supplementary Figure B.2:** Support for the six-month terminal phase: Total monthly costs following lung cancer diagnosis, by survival time
- Page 5** – **Supplementary Figure B.3:** Change in baseline healthcare costs during the prediagnosis phase
- Page 6** – **Supplementary Table B.1:** Results of a sensitivity analysis to determine the effect of increasing baseline healthcare costs
- Page 7** – **Supplementary Table B.2:** Number and percent of patients in each treatment group – Initial phase
- Page 8** – **Supplementary Table B.3:** Number and percent of patients in each treatment group – Continuing phase
- Page 9** – **Supplementary Table B.4:** Monthly prediagnosis phase healthcare costs by age and year and significant predictors
- Page 10** – **Supplementary Table B.5:** Significant predictors of cost during the staging phase and costs for a patient aged 70 in 2017 by histology, stage at diagnosis, and treatment strategy
- Page 12** – **Supplementary Table B.6:** Monthly terminal phase costs by age and year and significant predictors by cause of death
- Page 13** – **Supplementary Table B.7:** Monthly prescription drug costs for an average patient age 70 in 2017
- Page 14** – **Supplementary Table B.8:** Average monthly costs of erlotinib, by phase, 2007-2013
- Page 15** – **Supplementary Table B.9:** Why not just inflate previous SEER-Medicare cost estimates?
- Page 16** – **Supplementary Table B.10:** Cost estimates using a one-month terminal phase, for a patient who died at age 70 in 2017

# Supplementary Figure B.1

Average monthly costs 15 months prediagnosis to 6 months postdiagnosis

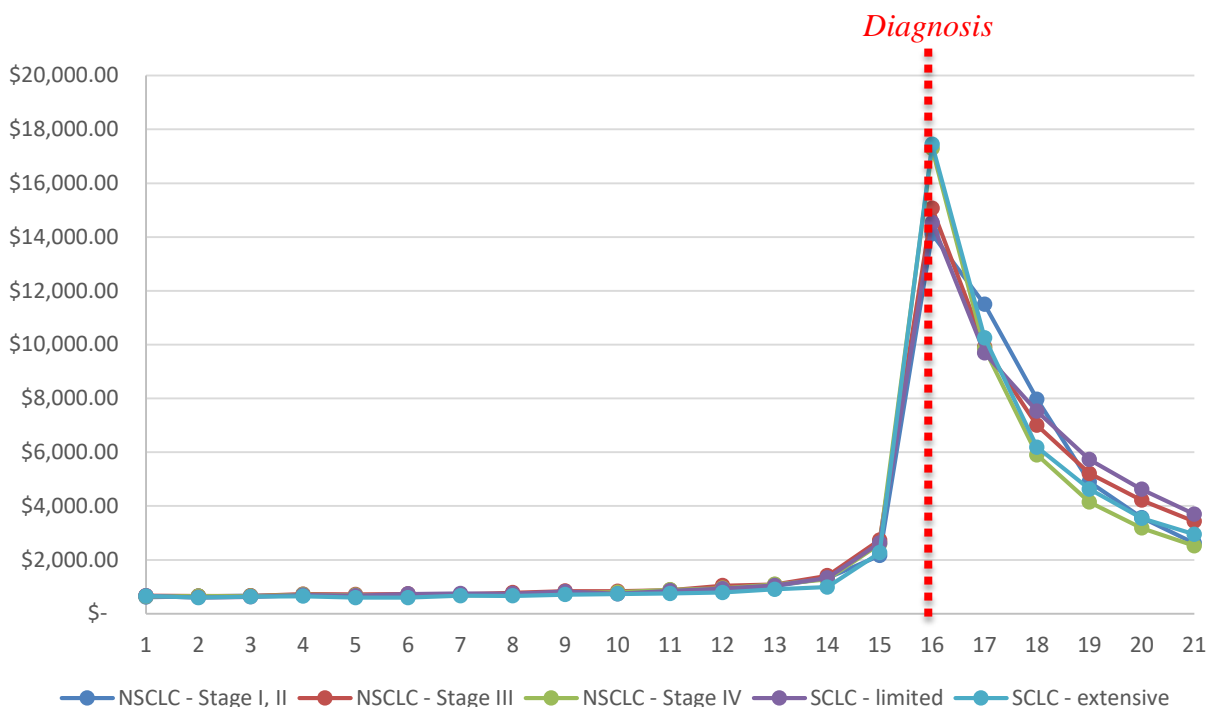

**Supplementary Figure 1.** This figure shows total monthly healthcare costs from 15 months prior to lung cancer diagnosis through 6 months post-diagnosis, where month 16 represents the month beginning on the date of diagnosis.

## Supplementary Figure B.2

Support for the six-month terminal phase: Total monthly costs following lung cancer diagnosis, by survival time

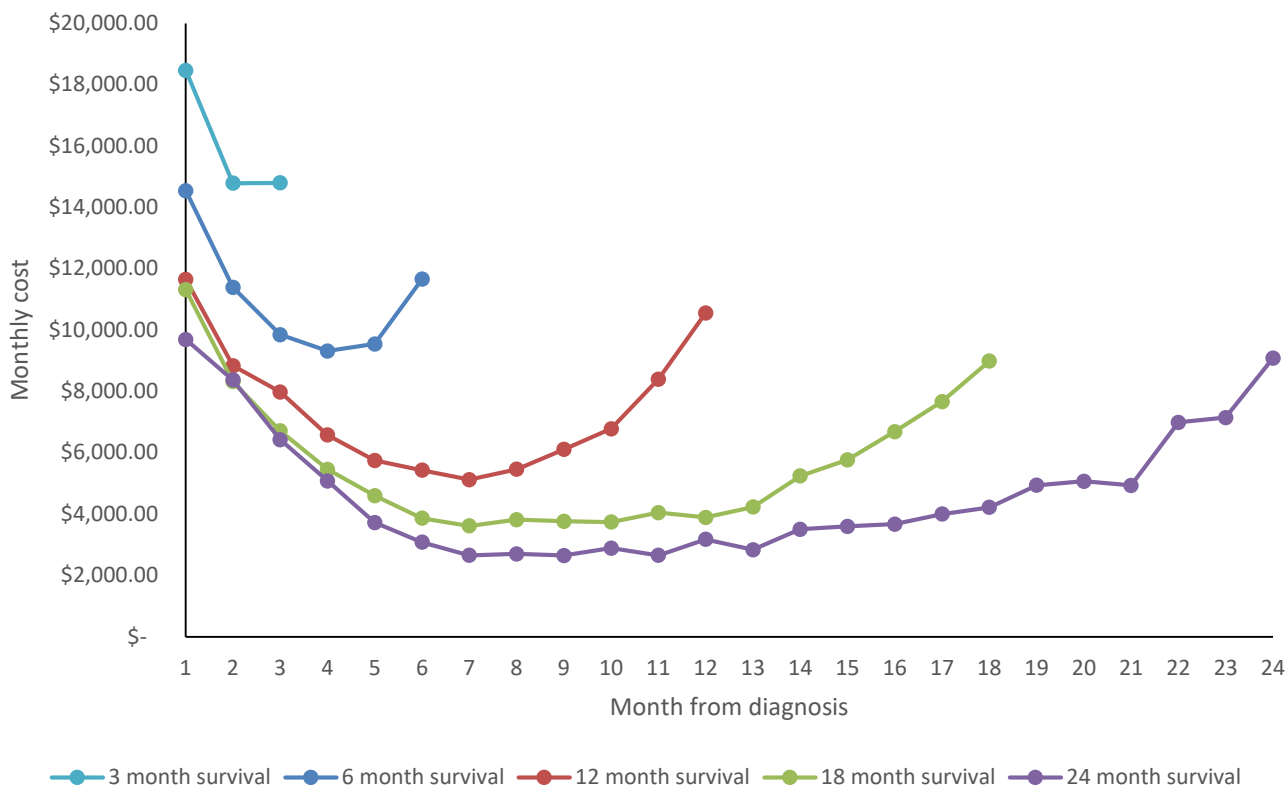

**Supplementary Figure 2.** Costs are high during the month of lung cancer diagnosis and/or surgery. Costs then begin to fall during the months categorized as the initial and continuing phases, and rise again prior to death. For patients who live at least one year, costs begin to rise again about 5-6 months prior to death. Our decision to use a six-month terminal phase is also supported by our finding that costs during the six months prior to death are, on average, 2.9 times as high as costs in the period 7-12 months before death. This figure supports our decision to have a six-month terminal phase.

# Supplementary Figure B.3

## Change in baseline healthcare costs during the prediagnosis phase

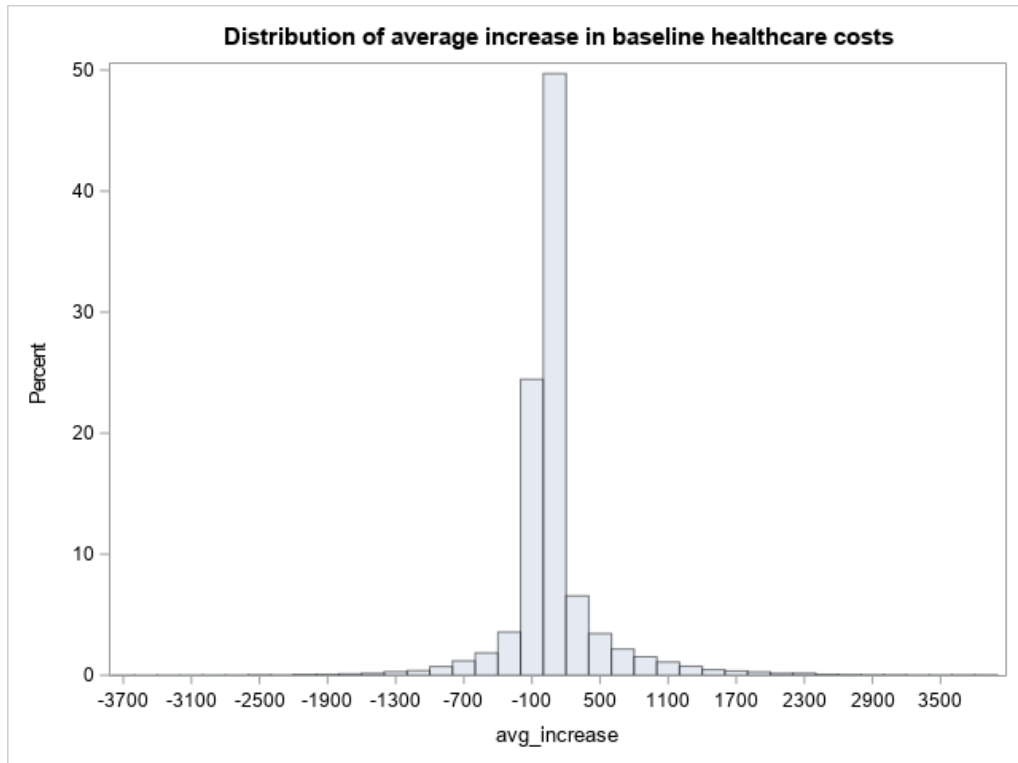

**Supplementary Figure 3.** We performed a sensitivity analysis to determine the effect that increasing baseline healthcare costs have on the cancer-attributable costs calculated in our analysis. This figure shows that the distribution of change in baseline healthcare costs was relatively normally distributed around 0, meaning that a large proportion of patients happened to see a decrease in healthcare costs during the five years prior to lung cancer diagnosis. Results of the sensitivity analysis can be found in Supplementary Table B.1.

# Supplementary Table B.1

Results of a sensitivity analysis to determine the effect of increasing baseline healthcare costs

|                                                       | Original | Accounting for rising baseline healthcare costs |
|-------------------------------------------------------|----------|-------------------------------------------------|
| Initial phase monthly cancer attributable total cost  | \$2,132  | \$2,064                                         |
| Terminal phase monthly cancer attributable total cost | \$9,877  | \$9,642                                         |

**Supplementary Table 1.** We calculated monthly healthcare costs for the five years prior to lung cancer diagnosis among the 27,208 early-stage lung cancer patients who had been enrolled in Medicare for that entire time-period. We then determined the average annual change in prediagnosis healthcare costs, and, assuming a linear increase in baseline healthcare costs, removed the annual average from the cancer-attributable healthcare costs post-diagnosis each year. Average monthly cancer-attributable costs during the initial phase decreased from \$2,132 to \$2,064, while average costs during the terminal phase decreased from \$9,877 to \$9,642. The relatively small change in cancer-attributable costs (3.2% for initial phase and 2.4% for terminal phase) among these early-stage patients has assured us that we are not significantly over-estimating patients' cancer-attributable costs.

We performed this sensitivity analysis among patients diagnosed with stage I or II lung cancer. Average post-diagnosis survival times for stages III and IV patients are 13.5 and 7.3 months, respectively, meaning that late-stage patients do not survive long enough for their baseline healthcare costs to increase much beyond what we originally used to represent baseline healthcare costs. Early-stage patients, on the other hand, often survive for years following their lung cancer diagnosis. Performing the sensitivity analysis among this group of patients enables us to determine the effect of rising baseline healthcare costs among patients with the highest average survival times during which baseline costs often rise due to comorbid conditions. As seen in Supplementary Figure B.3, many patients' baseline healthcare costs decreased during the prediagnosis period. For a patient who lives multiple years following lung cancer diagnosis, we do not believe it would be accurate to continue to linearly extrapolate decreasing healthcare costs as that patient ages. Thus, we included this analysis as a sensitivity analysis in the Appendix, rather than in the methods for how we report cancer-attributable costs in the main manuscript.

## Supplementary Table B.2

### Number and percent of patients in each treatment group – Initial phase

| INITIAL PHASE               | n      | %     | <i>continued</i>            | n      | %     |
|-----------------------------|--------|-------|-----------------------------|--------|-------|
| <b>NSCLC</b>                | 26,959 |       | <b>SCLC</b>                 |        |       |
| <b>Stage 1-2</b>            |        |       | <b>Limited Stage</b>        | 10,331 |       |
| Best supportive care        | 3,913  | 14.51 | Best supportive care        | 1,581  | 15.3  |
| Surgery                     | 13,872 | 51.46 | Chemotherapy                | 1,523  | 14.74 |
| Radiation                   | 3,453  | 12.81 | Radiation                   | 1,871  | 18.11 |
| Chemotherapy                | 416    | 1.54  | Chemo + radiation           | 4,057  | 39.27 |
| Chemo + radiation           | 1,400  | 5.19  | Surgery                     | 750    | 7.26  |
| Chemo + surgery             | 1,233  | 4.57  | Chemo + surgery             | 223    | 2.16  |
| Radiation + surgery         | 2,045  | 7.59  | Radiation + surgery         | 144    | 1.39  |
| Chemo + radiation + surgery | 627    | 2.33  | Chemo + radiation + surgery | 182    | 1.76  |
|                             |        |       |                             |        |       |
| <b>Stage 3</b>              | 16,282 |       | <b>Extensive Stage*</b>     | 7,591  |       |
| Best supportive care        | 3,335  | 20.48 | Best supportive care        | 445    | 5.86  |
| Radiation                   | 2,973  | 18.26 | Chemotherapy                | 1,364  | 17.97 |
| Chemotherapy                | 1,902  | 11.68 | Radiation                   | 736    | 9.7   |
| Chemo + radiation           | 4,509  | 27.69 | Chemo + radiation           | 4,917  | 64.77 |
| Surgery                     | 1,577  | 9.69  | Chemo + radiation + surgery | 84     | 1.11  |
| Radiation + surgery         | 648    | 3.98  |                             |        |       |
| Chemo + surgery             | 600    | 3.69  |                             |        |       |
| Chemo + radiation + surgery | 738    | 4.53  |                             |        |       |
|                             |        |       |                             |        |       |
| <b>Stage 4</b>              | 13,583 |       |                             |        |       |
| Best supportive care        | 1,830  | 13.47 |                             |        |       |
| Radiation                   | 2,349  | 17.29 |                             |        |       |
| Chemotherapy                | 2,050  | 15.09 |                             |        |       |
| Chemo + radiation           | 6,283  | 46.26 |                             |        |       |
| Surgery                     | 136    | 1.0   |                             |        |       |
| Radiation + surgery         | 255    | 1.88  |                             |        |       |
| Chemo + surgery             | 175    | 1.29  |                             |        |       |
| Chemo + radiation + surgery | 505    | 3.72  |                             |        |       |

\*Additional treatment combinations each made up less than 1% of treatment strategies for SCLC extensive stage patients.

## Supplementary Table B.3

### Number and percent of patients in each treatment group – Continuing phase

| CONTINUING PHASE            | n      | %     |
|-----------------------------|--------|-------|
| <b>NSCLC</b>                |        |       |
| <b>Stage 1-2</b>            | 23,712 |       |
| Best supportive care        | 3,199  | 13.49 |
| Surgery                     | 13,197 | 55.66 |
| Radiation                   | 2,586  | 10.91 |
| Chemotherapy                | 287    | 1.21  |
| Chemo + radiation           | 955    | 4.03  |
| Surgery + Radiation         | 1,839  | 7.76  |
| Surgery + Chemo             | 1,124  | 4.74  |
| Surgery + chemo + radiation | 525    | 2.21  |
|                             |        |       |
| <b>Stage 3</b>              | 10,960 |       |
| Best supportive care        | 2,255  | 20.57 |
| Chemotherapy                | 1,184  | 10.8  |
| Chemo + radiation           | 2,738  | 24.98 |
| Radiation                   | 1,813  | 16.54 |
| Surgery                     | 1,395  | 12.73 |
| Surgery + chemo             | 507    | 4.63  |
| Surgery + radiation         | 510    | 4.65  |
| Surgery + chemo + radiation | 558    | 5.09  |
|                             |        |       |
| <b>Stage 4</b>              | 7,443  |       |
| Best supportive care        | 893    | 12    |
| Chemotherapy                | 1,124  | 15.1  |
| Chemo + radiation           | 3,512  | 47.19 |
| Radiation                   | 1,091  | 14.66 |
| Surgery                     | 108    | 1.45  |
| Surgery + chemo             | 128    | 1.72  |
| Surgery + radiation         | 193    | 2.59  |
| Surgery + chemo + radiation | 394    | 5.29  |

| <i>continued</i>            | n     | %     |
|-----------------------------|-------|-------|
| <b>SCLC</b>                 |       |       |
| <b>Limited Stage</b>        | 6,928 |       |
| Best supportive care        | 1,154 | 16.66 |
| Chemotherapy                | 868   | 12.53 |
| Radiation                   | 1,280 | 18.48 |
| Chemo + radiation           | 2,508 | 36.2  |
| Surgery                     | 675   | 9.74  |
| Surgery + chemo             | 188   | 2.71  |
| Surgery + radiation         | 108   | 1.56  |
| Surgery + chemo + radiation | 147   | 2.12  |
|                             |       |       |
| <b>Extensive Stage*</b>     | 3,476 |       |
| Best supportive care        | 198   | 5.7   |
| Chemotherapy                | 561   | 16.14 |
| Radiation                   | 315   | 9.06  |
| Chemo + radiation           | 2,316 | 66.63 |
| Chemo + radiation + surgery | 56    | 1.61  |

\*Additional treatment combinations each made up less than 1% of treatment strategies for SCLC extensive stage patients.



## Supplementary Table B.4

Monthly prediagnosis phase healthcare costs by age and year and significant predictors\*

|                               | Predictors |       |       |      |     |
|-------------------------------|------------|-------|-------|------|-----|
|                               | 2000       | 2010  | 2017  | Year | Age |
| <b>Total cost</b>             |            |       |       | +    | +   |
| 65                            | \$516      | \$688 | \$809 |      |     |
| 70                            | \$568      | \$740 | \$861 |      |     |
| 75                            | \$620      | \$792 | \$913 |      |     |
| 80                            | \$672      | \$844 | \$965 |      |     |
| <b>Patient liability cost</b> |            |       |       | +    | +   |
| 65                            | \$60       | \$70  | \$77  |      |     |
| 70                            | \$67       | \$77  | \$84  |      |     |
| 75                            | \$75       | \$85  | \$92  |      |     |
| 80                            | \$82       | \$92  | \$99  |      |     |

\* A positive (+) symbol indicates that the covariate in the regression model has a parameter estimate greater than 0, while a negative (-) symbol indicates that the parameter estimate is less than 0. Coefficients for the fitted regressions are presented in Appendix C: Regression Parameters.

## Supplementary Table B.5

Significant predictors of cost during the staging phase and costs for a patient aged 70 in 2017 by histology, stage at diagnosis, and treatment strategy\*

|                          | N (%)        | Total cost | 95% CI               | Patient liability | 95% CI             | Predictors |     |
|--------------------------|--------------|------------|----------------------|-------------------|--------------------|------------|-----|
|                          |              |            |                      |                   |                    | Year       | Age |
| <b>NSCLC</b>             |              |            |                      |                   |                    |            |     |
| <b>Stages I and II</b>   |              |            |                      |                   |                    |            |     |
| Best supportive care     | 4,064 (42.4) | \$6,670    | \$6,014 to \$7,327   | \$677             | \$610 to \$744     |            | +   |
| Radiation                | 3,610 (37.7) | \$9,739    | \$8,957 to \$10,522  | \$872             | \$712 to \$1,033   |            | -   |
| Chemotherapy + Radiation | 1,467 (15.3) | \$8,576    | \$7,885 to \$9,267   | \$1,166           | \$1,111 to \$1,220 |            | -   |
| <b>Stage III</b>         |              |            |                      |                   |                    |            |     |
| Best supportive care     | 3,608 (26.1) | \$9,560    | \$8,765 to \$10,354  | \$905             | \$820 to \$989     |            | +   |
| Radiation                | 3,273 (23.7) | \$10,636   | \$10,104 to \$11,168 | \$1,264           | \$1,217 to \$1,312 |            |     |
| Chemotherapy             | 2,008 (14.5) | \$10,476   | \$9,897 to \$11,055  | \$873             | \$720 to \$1,025   |            |     |
| Chemotherapy + Radiation | 4,923 (35.6) | \$9,722    | \$9,272 to \$10,171  | \$944             | \$832 to \$1,057   |            | -   |
| <b>Stage IV</b>          |              |            |                      |                   |                    |            |     |
| Best supportive care     | 2,167 (15.2) | \$12,961   | \$11,972 to \$13,950 | \$1,271           | \$1,176 to \$1,366 |            |     |
| Radiation †              | 2,801 (19.7) | \$13,608   | \$10,399 to \$16,818 | \$960             | \$676 to \$1,244   | -          | -   |
| Chemotherapy             | 2,300 (16.1) | \$11,311   | \$10,451 to \$12,171 | \$876             | \$688 to \$1,063   |            | -   |
| Chemotherapy + Radiation | 6,980 (49.0) | \$9,627    | \$8,454 to \$10,800  | \$1,033           | \$938 to \$1,128   | -          | -   |

See following page for SCLC results and footnotes.

Continued: Significant predictors of cost during the staging phase and costs for a patient aged 70 in 2017 by histology, stage at diagnosis, and treatment strategy

|                          | N (%)        | Total cost | 95% CI               | Patient liability | 95% CI             | Predictors |     |
|--------------------------|--------------|------------|----------------------|-------------------|--------------------|------------|-----|
|                          |              |            |                      |                   |                    | Year       | Age |
| <b>SCLC</b>              |              |            |                      |                   |                    |            |     |
| <b>Limited Stage</b>     | 9,645        |            |                      |                   |                    |            |     |
| Best supportive care     | 1,669 (17.3) | \$7,397    | \$6,067 to \$8,728   | \$756             | \$648 to \$864     |            | +   |
| Radiation                | 2,028 (21.0) | \$8,808    | \$8,217 to \$9,399   | \$661             | \$379 to \$944     |            |     |
| Chemotherapy             | 1,623 (16.8) | \$11,346   | \$10,543 to \$12,149 | \$852             | \$600 to \$1,105   |            |     |
| Chemotherapy + Radiation | 4,325 (44.8) | \$11,057   | \$10,524 to \$11,589 | \$1,209           | \$1,070 to \$1,348 |            | -   |
| <b>Extensive Stage</b>   | 8,411        |            |                      |                   |                    |            |     |
| Best supportive care     | 535 (6.4)    | \$10,697   | \$9,377 to \$12,017  | \$1,003           | \$877 to \$1,129   |            |     |
| Radiation                | 895 (10.6)   | \$12,631   | \$11,443 to \$13,819 | \$1,383           | \$1,267 to \$1,499 |            |     |
| Chemotherapy             | 1,574 (18.7) | \$10,431   | \$9,778 to \$11,083  | \$820             | \$549 to \$1,092   |            |     |
| Chemotherapy + Radiation | 5,407 (64.3) | \$12,852   | \$12,360 to \$13,345 | \$1,259           | \$1,143 to \$1,375 |            | -   |

\* The directions of significant predictors are shown for linear regression models of total costs. A positive (+) symbol indicates that the covariate in the regression model has a parameter estimate greater than 0, while a negative (-) symbol indicates that the parameter estimate is less than 0. With the exception of best supportive care costs, treatment strategy costs are not shown if less than 10% of patients within a stage/histology group received that treatment. Coefficients for the fitted regressions are presented in the Appendix.

† The interaction term between year and age was significant in the model for Stage IV NSCLC patients who received radiation. The parameter estimate of the interaction term was positive, so costs decreased with age but increased over time.

## Supplementary Table B.6

### Monthly terminal phase costs by age and year and significant predictors by cause of death\*

|                              |    | 2000     | 2010     | 2017     | Predictors |     |              |
|------------------------------|----|----------|----------|----------|------------|-----|--------------|
|                              |    |          |          |          | Year       | Age | Year*<br>age |
| <b>Lung cancer death</b>     |    |          |          |          |            |     |              |
| Total cost †                 |    |          |          |          | +          | -   | -            |
|                              | 65 | \$14,795 | \$14,506 | \$14,305 |            |     |              |
|                              | 70 | \$14,053 | \$13,426 | \$12,987 |            |     |              |
|                              | 75 | \$13,311 | \$12,345 | \$11,669 |            |     |              |
|                              | 80 | \$12,570 | \$11,265 | \$10,351 |            |     |              |
| Patient liability cost ‡     |    |          |          |          |            | -   | -            |
|                              | 65 | \$1,439  | \$1,350  | \$1,288  |            |     |              |
|                              | 70 | \$1,347  | \$1,238  | \$1,161  |            |     |              |
|                              | 75 | \$1,256  | \$1,126  | \$1,035  |            |     |              |
|                              | 80 | \$1,165  | \$1,014  | \$909    |            |     |              |
| <b>Non-lung cancer death</b> |    |          |          |          |            |     |              |
| Total cost                   |    |          |          |          | -          | -   |              |
|                              | 65 | \$20,351 | \$15,247 | \$11,673 |            |     |              |
|                              | 70 | \$18,944 | \$13,840 | \$10,266 |            |     |              |
|                              | 75 | \$17,537 | \$12,433 | \$8,859  |            |     |              |
|                              | 80 | \$16,131 | \$11,026 | \$7,452  |            |     |              |
| Patient liability cost ‡     |    |          |          |          |            | -   | -            |
|                              | 65 | \$1,496  | \$1,232  | \$1,048  |            |     |              |
|                              | 70 | \$1,422  | \$1,126  | \$919    |            |     |              |
|                              | 75 | \$1,349  | \$1,020  | \$789    |            |     |              |
|                              | 80 | \$1,276  | \$914    | \$660    |            |     |              |

\* A positive (+) symbol indicates that the covariate in the regression model has a parameter estimate greater than 0,

while a negative (-) symbol indicates that the parameter estimate is less than 0. Coefficients for the fitted regressions are presented in the Appendix.

† The interaction term between year and age was significant and negative in the model for total lung cancer death cost. Costs decreased over time, even though the coefficient for year was positive in the model.

‡ The interaction term between year and age was significant in the models for lung cancer death and non-lung cancer death patient liability cost. Year was kept in the models although it was not significant ( $p=0.07$  for lung cancer death,  $p=0.39$  for non-lung cancer death) to ensure the model's terms were hierarchically well-formulated.

## Supplementary Table B.7

Monthly prescription drug costs for an average patient age 70 in 2017

|                                                   | Estimate | 95% CI           |
|---------------------------------------------------|----------|------------------|
| <b>Prediagnosis phase</b>                         | \$ 651   | \$636 to \$666   |
| <b>Surgery phase</b>                              | \$ 604   | \$562 to \$646   |
| <b>Staging phase</b>                              | \$ 992   | \$928 to \$1,057 |
| <b>Initial phase, cancer-attributable cost</b>    |          |                  |
| Best supportive care                              | \$ 845   | \$646 to \$1,045 |
| Surgery                                           | \$ 221   | \$181 to \$261   |
| Chemotherapy                                      | \$ 875   | \$641 to \$1,108 |
| Radiation                                         | \$ 487   | \$361 to \$613   |
| Chemotherapy + radiation                          | \$ 675   | \$576 to \$774   |
| <b>Continuing phase, cancer-attributable cost</b> |          |                  |
| Best supportive care                              | \$ 120   | \$61 to \$178    |
| Surgery                                           | \$ 28    | \$5 to \$51      |
| Chemotherapy                                      | \$ 279   | \$188 to \$370   |
| Radiation                                         | \$ 26    | (\$25) to \$77   |
| Chemotherapy + radiation                          | \$ 198   | \$156 to \$240   |
| <b>Terminal phase</b>                             | \$ 1050  | \$954 to \$1,146 |

# Supplementary Table B.8

Average monthly costs of erlotinib, by phase, 2007-2013

|                     | <b>n</b> | <b>Total<br/>cost</b> | <b>95% CI</b>       | <b>Patient liability<br/>cost</b> | <b>95% CI</b>  |
|---------------------|----------|-----------------------|---------------------|-----------------------------------|----------------|
| Initial phase       | 2596     | \$671                 | \$610 to \$732      | \$98                              | \$85 to \$112  |
| Continuing<br>phase | 2114     | \$1484                | \$1405 to<br>\$1564 | \$135                             | \$123 to \$148 |
| Terminal phase      | 2723     | \$1844                | \$1777 to<br>\$1912 | \$252                             | \$236 to \$268 |

## Supplementary Table B.9

---

Why not just inflate previous SEER-Medicare cost estimates?

|        | <b>Previous cost manuscript, 2000 costs in 2006 USD</b> | <b>Old costs inflated 3% per year to 2017 USD</b> | <b>Cost update, 2000 costs in 2017 USD</b> |
|--------|---------------------------------------------------------|---------------------------------------------------|--------------------------------------------|
| Age 65 | \$ 554                                                  | \$ 722                                            | \$ 516                                     |
| Age 70 | \$ 619                                                  | \$ 807                                            | \$ 568                                     |
| Age 75 | \$ 683                                                  | \$ 892                                            | \$ 620                                     |
| Age 80 | \$ 748                                                  | \$ 976                                            | \$ 672                                     |

## Supplementary Table B.10

---

Cost estimates using a one-month terminal phase, for a patient who died at age 70 in 2017

|                      | <b>Six-month<br/>terminal phase</b> | <b>One-month<br/>terminal phase</b> |
|----------------------|-------------------------------------|-------------------------------------|
| Lung cancer death    | \$12,987                            | \$21,603                            |
| Other cause of death | \$10,266                            | \$23,179                            |
