# Supplementary material for: Lung cancer costs by treatment strategy and phase of care among patients enrolled in Medicare
Source: PubMed Central journal article supplement (PMC6346221; doi:10.1002/cam4.1896), 2018-12-21
Supplement: CAM4-8-94-s003.pdf [file CAM4-8-94-s003.pdf]

# C: Regression parameters

## Appendix

Sheehan et al. 2018

# Contents

---

- Page 3** – **Parameter estimates of linear regression models**
  
- Page 3** – Prediagnosis phase
  
- Page 3** – Surgery phase
  
- Page 4** – Staging phase
  
- Page 10** – Initial phase
  
- Page 17** – Continuing phase
  
- Page 24** – Terminal phase
  
- Page 25** – **Parameter estimates of linear regression models: Medicare Part D**
  
- Page 25** – Prediagnosis phase: Part D
  
- Page 25** – Surgery phase: Part D
  
- Page 26** – Staging phase: Part D
  
- Page 27** – Initial phase: Part D
  
- Page 28** – Continuing phase: Part D
  
- Page 29** – Terminal phase: Part D

# Linear regression models – continued

---

## PREDIAGNOSIS PHASE

| Parameter                                                | Parameter Estimate | Standard error | P-value |
|----------------------------------------------------------|--------------------|----------------|---------|
| <b>Prediagnosis phase – total cost model</b>             |                    |                |         |
| Intercept                                                | -161.88817         | 56.72401       | 0.0043  |
| Year                                                     | 17.24651           | 1.4078         | <.0001  |
| Age                                                      | 10.42334           | 0.73743        | <.0001  |
| <b>Prediagnosis phase – patient liability cost model</b> |                    |                |         |
| Intercept                                                | -34.67437          | 5.5127         | <.0001  |
| Year                                                     | 1.00019            | 0.13682        | <.0001  |
| Age                                                      | 1.45677            | 0.07167        | <.0001  |

## SURGERY PHASE

| Parameter                                           | Parameter Estimate | Standard error | P-value |
|-----------------------------------------------------|--------------------|----------------|---------|
| <b>Surgery phase – total cost model</b>             |                    |                |         |
| Intercept                                           | 34471              | 612.31495      | <.0001  |
| Year                                                | -257.34871         | 94.97436       | 0.0067  |
| <b>Surgery phase – patient liability cost model</b> |                    |                |         |
| Intercept                                           | 1363.60608         | 30.89565       | <.0001  |
| Year                                                | 22.05216           | 4.79213        | <.0001  |
| <b>Operative death – total cost model</b>           |                    |                |         |
| Intercept                                           | 149010             | 8975.8405      | <.0001  |
| Year                                                | 3614.24227         | 1461.0392      | 0.0135  |

# Linear regression models – continued

## STAGING PHASE: Stage I, II NSCLC

| Parameter                                                | Parameter Estimate | Standard error | P-value |
|----------------------------------------------------------|--------------------|----------------|---------|
| <b>Best supportive care – total cost model</b>           |                    |                |         |
| Intercept                                                | -4052.62999        | 2472.0802      | 0.1012  |
| Age                                                      | 153.18426          | 31.60036       | <.0001  |
| <b>Best supportive care – patient liability model</b>    |                    |                |         |
| Intercept                                                | -842.887           | 253.2983       | 0.0009  |
| Age                                                      | 21.71117           | 3.23789        | <.0001  |
| <b>Radiation – total cost model</b>                      |                    |                |         |
| Intercept                                                | 16900              | 2910.8215      | <.0001  |
| Age                                                      | -102.30212         | 36.87958       | 0.0056  |
| <b>Radiation – patient liability cost model</b>          |                    |                |         |
| Intercept                                                | 1304.694           | 51.57009       | <.0001  |
| Year                                                     | -25.4311           | 7.1608         | 0.0004  |
| <b>Chemotherapy + radiation – total cost model</b>       |                    |                |         |
| Intercept                                                | 17000              | 3478.5806      | <.0001  |
| Age                                                      | -120.34813         | 46.21619       | 0.0093  |
| <b>Chemotherapy + radiation – patient liability cost</b> |                    |                |         |
| No significant predictors. SD = 1069                     |                    |                |         |

# Linear regression models – continued

## STAGING PHASE: Stage III NSCLC

| Parameter                                                      | Parameter Estimate | Standard error | P-value |
|----------------------------------------------------------------|--------------------|----------------|---------|
| <b>Best supportive care – total cost model</b>                 |                    |                |         |
| Intercept                                                      | -4022.71436        | 2906.0321      | 0.1664  |
| Age                                                            | 194.03953          | 36.95381       | <.0001  |
| <b>Best supportive care – patient liability cost model</b>     |                    |                |         |
| Intercept                                                      | -803.621           | 309.8075       | 0.0095  |
| Age                                                            | 24.40427           | 3.93959        | <.0001  |
| <b>Radiation – total cost</b>                                  |                    |                |         |
| No significant predictors. SD = 15540                          |                    |                |         |
| <b>Radiation – patient liability cost</b>                      |                    |                |         |
| No significant predictors. SD = 1390                           |                    |                |         |
| <b>Chemotherapy – total cost</b>                               |                    |                |         |
| No significant predictors. SD = 13227                          |                    |                |         |
| <b>Chemotherapy – patient liability cost</b>                   |                    |                |         |
| Intercept                                                      | 1286.51            | 37.09647       | <.0001  |
| Year                                                           | -24.3272           | 6.17           | <.0001  |
| <b>Chemotherapy + radiation – total cost model</b>             |                    |                |         |
| Intercept                                                      | 17752              | 2552.7498      | <.0001  |
| Age                                                            | -114.7186          | 34.35076       | 0.0008  |
| <b>Chemotherapy + radiation – patient liability cost model</b> |                    |                |         |
| Intercept                                                      | 1456.53            | 32.81529       | <.0001  |
| Year                                                           | -30.1217           | 4.8651         | <.0001  |

# Linear regression models – continued

## STAGING PHASE: Stage IV NSCLC

| Parameter                                            | Parameter Estimate | Standard error | P-value |
|------------------------------------------------------|--------------------|----------------|---------|
| <b>Best supportive care – total cost model</b>       |                    |                |         |
| No significant predictors. SD = 23473                |                    |                |         |
| <b>Best supportive care – patient liability cost</b> |                    |                |         |
| No significant predictors. SD = 2258                 |                    |                |         |
| <b>Radiation – total cost model</b>                  |                    |                |         |
| Intercept                                            | 42028              | 7689.6185      | <.0001  |
| Age                                                  | -384.63833         | 100.757        | 0.0001  |
| Year                                                 | -2220.44811        | 1084.5337      | 0.0407  |
| Age*year interaction                                 | 30.46413           | 14.05493       | 0.0303  |
| <b>Radiation – patient liability cost model</b>      |                    |                |         |
| Intercept                                            | 3592.16            | 680.481        | <.0001  |
| Age                                                  | -27.3405           | 8.91634        | 0.0022  |
| Year                                                 | -310.945           | 95.97415       | 0.0012  |
| Age*year interaction                                 | 3.83828            | 1.24377        | 0.002   |
| <b>Chemotherapy – total cost model</b>               |                    |                |         |
| Intercept                                            | 28996              | 4332.0333      | <.0001  |
| Age                                                  | -252.64527         | 57.465         | <.0001  |
| <b>Chemotherapy – patient liability cost model</b>   |                    |                |         |
| Intercept                                            | 2330.385           | 320.6435       | <.0001  |
| Age                                                  | -14.2002           | 4.26111        | 0.0009  |
| Year                                                 | -27.1019           | 7.32543        | 0.0002  |
| <b>Chemotherapy + radiation – total cost model</b>   |                    |                |         |
| Intercept                                            | 23602              | 2468.1868      | <.0001  |
| Age                                                  | -163.12211         | 33.37285       | <.0001  |
| Year                                                 | -150.36202         | 51.05097       | 0.0032  |

# Linear regression models – continued

---

## *Continued* – STAGING PHASE: Stage IV NSCLC

| Parameter                                                      | Parameter Estimate | Standard error | P-value |
|----------------------------------------------------------------|--------------------|----------------|---------|
| <b>Chemotherapy + radiation – patient liability cost model</b> |                    |                |         |
| Intercept                                                      | 2348.931           | 199.7462       | <.0001  |
| Age                                                            | -12.6817           | 2.70081        | <.0001  |
| Year                                                           | -25.2072           | 4.13147        | <.0001  |

# Linear regression models – continued

## STAGING PHASE: Limited Stage SCLC

| Parameter                                                      | Parameter Estimate | Standard error | P-value |
|----------------------------------------------------------------|--------------------|----------------|---------|
| <b>Best supportive care – total cost model</b>                 |                    |                |         |
| Intercept                                                      | -6058.60985        | 5475.7994      | 0.2687  |
| Age                                                            | 192.22943          | 70.82557       | 0.0067  |
| <b>Best supportive care – patient liability cost model</b>     |                    |                |         |
| Intercept                                                      | -995.754           | 445.6626       | 0.0256  |
| Age                                                            | 25.02324           | 5.76433        | <.0001  |
| <b>Radiation – total cost model</b>                            |                    |                |         |
| No significant predictors. SD=13574                            |                    |                |         |
| <b>Radiation – patient liability cost model</b>                |                    |                |         |
| Intercept                                                      | 1420.079           | 74.94313       | <.0001  |
| Year                                                           | -44.6302           | 11.98831       | 0.0002  |
| <b>Chemotherapy – total cost model</b>                         |                    |                |         |
| No significant predictors. SD=16492                            |                    |                |         |
| <b>Chemotherapy – patient liability cost model</b>             |                    |                |         |
| Intercept                                                      | 1355.077           | 50.27994       | <.0001  |
| Year                                                           | -29.5661           | 9.8051         | 0.0026  |
| <b>Chemotherapy + radiation – total cost model</b>             |                    |                |         |
| Intercept                                                      | 20328              | 3129.8432      | <.0001  |
| Age                                                            | -132.44477         | 42.31167       | 0.0018  |
| <b>Chemotherapy + radiation – patient liability cost model</b> |                    |                |         |
| Intercept                                                      | 1466.358           | 37.45487       | <.0001  |
| Year                                                           | -15.1607           | 5.92479        | 0.0105  |



# Linear regression models – continued

## STAGING PHASE: Extensive Stage SCLC

| Parameter                                                      | Parameter Estimate | Standard error | P-value |
|----------------------------------------------------------------|--------------------|----------------|---------|
| <b>Best supportive care – total cost</b>                       |                    |                |         |
| No significant predictors. SD=15542                            |                    |                |         |
| <b>Best supportive care – patient liability cost</b>           |                    |                |         |
| No significant predictors. SD=1482                             |                    |                |         |
| <b>Radiation – total cost</b>                                  |                    |                |         |
| No significant predictors. SD=18111                            |                    |                |         |
| <b>Radiation – patient liability cost</b>                      |                    |                |         |
| No significant predictors. SD=1770                             |                    |                |         |
| <b>Chemotherapy – total cost</b>                               |                    |                |         |
| No significant predictors                                      |                    |                |         |
| <b>Chemotherapy – patient liability cost model</b>             |                    |                |         |
| Intercept                                                      | 1368.97            | 59.98028       | <.0001  |
| Year                                                           | -32.2634           | 10.92992       | 0.0032  |
| <b>Chemotherapy + radiation – total cost model</b>             |                    |                |         |
| Intercept                                                      | 26876              | 3038.7687      | <.0001  |
| Age                                                            | -200.34107         | 41.32708       | <.0001  |
| <b>Chemotherapy + radiation – patient liability cost model</b> |                    |                |         |
| Intercept                                                      | 1496.123           | 34.27684       | <.0001  |
| Year                                                           | -13.9579           | 5.12249        | 0.0065  |

# Linear regression models – continued

## INITIAL PHASE: Stage I, II NSCLC

| Parameter                                      | Parameter Estimate | Standard error | P-value |
|------------------------------------------------|--------------------|----------------|---------|
| <b>Best supportive care – total cost model</b> |                    |                |         |
| Intercept                                      | 2239.07028         | 139.55441      | <.0001  |
| Year                                           | 53.34942           | 22.64084       | 0.0185  |
| <b>Surgery – total cost model</b>              |                    |                |         |
| Intercept                                      | 1298.6318          | 57.44912       | <.0001  |
| Year                                           | 22.17895           | 9.30905        | 0.0172  |
| <b>Radiation – total cost model</b>            |                    |                |         |
| Intercept                                      | 7311.77448         | 1044.1386      | <.0001  |
| Age                                            | -42.13772          | 13.22884       | 0.0015  |
| Year                                           | 91.71285           | 23.32667       | <.0001  |

| Parameter                                              | Parameter Estimate | Standard error | P-value |
|--------------------------------------------------------|--------------------|----------------|---------|
| <b>Best supportive care – cancer attributable cost</b> |                    |                |         |
| No significant predictors. SD =4968                    |                    |                |         |
| <b>Surgery – cancer attributable cost model</b>        |                    |                |         |
| Intercept                                              | -14.63398          | 458.69827      | 0.9745  |
| Age                                                    | 12.0406            | 6.10808        | 0.0487  |
| <b>Radiation – cancer attributable cost model</b>      |                    |                |         |
| Intercept                                              | 3183.3687          | 172.75736      | <.0001  |
| Year                                                   | 62.29857           | 23.88229       | 0.0091  |

| Parameter                                            | Parameter Estimate | Standard error | P-value |
|------------------------------------------------------|--------------------|----------------|---------|
| <b>Best supportive care – patient liability cost</b> |                    |                |         |
| No significant predictors. SD=479                    |                    |                |         |
| <b>Surgery – patient liability cost</b>              |                    |                |         |
| No significant predictors. SD=453                    |                    |                |         |
| <b>Radiation – patient liability cost model</b>      |                    |                |         |
| Intercept                                            | 1177.17289         | 145.3694       | <.0001  |
| Year                                                 | -9.32439           | 3.24764        | 0.0041  |
| Age                                                  | -4.04327           | 1.84178        | 0.0282  |

# Linear regression models – continued

## INITIAL PHASE: Stage III NSCLC

| Parameter                                          | Parameter Estimate | Standard error | P-value |
|----------------------------------------------------|--------------------|----------------|---------|
| <b>Best supportive care – total cost</b>           |                    |                |         |
| No significant predictors. SD=4434                 |                    |                |         |
| <b>Chemotherapy + radiation – total cost model</b> |                    |                |         |
| Intercept                                          | 12739              | 1278.9054      | <.0001  |
| Age                                                | -68.47132          | 17.22935       | <.0001  |
| <b>Surgery – total cost model</b>                  |                    |                |         |
| Intercept                                          | 1565.27897         | 219.51051      | <.0001  |
| Year                                               | 102.7439           | 37.93277       | 0.0068  |
| <b>Radiation – total cost model</b>                |                    |                |         |
| Intercept                                          | 8808.54185         | 1372.6684      | <.0001  |
| Age                                                | -49.19456          | 17.82718       | 0.0058  |
| Year                                               | 104.76321          | 32.41248       | 0.0012  |
| <b>Chemotherapy – total cost model</b>             |                    |                |         |
| Intercept                                          | 10255              | 1701.165       | <.0001  |
| Age                                                | -56.66025          | 22.49716       | 0.0119  |
| Year                                               | 140.58843          | 36.19448       | 0.0001  |

| Parameter                                                        | Parameter Estimate | Standard error | P-value |
|------------------------------------------------------------------|--------------------|----------------|---------|
| <b>Best supportive care – cancer attributable cost</b>           |                    |                |         |
| No significant predictors. SD=4510                               |                    |                |         |
| <b>Chemotherapy + radiation – cancer attributable cost model</b> |                    |                |         |
| Intercept                                                        | 12140              | 1303.6911      | <.0001  |
| Age                                                              | -66.3364           | 17.56326       | 0.0002  |
| <b>Surgery – cancer attributable cost model</b>                  |                    |                |         |
| Intercept                                                        | 1173.4976          | 220.90966      | <.0001  |
| Year                                                             | 87.62112           | 38.17455       | 0.0219  |
| <b>Radiation – cancer attributable cost model</b>                |                    |                |         |
| Intercept                                                        | 7675.6687          | 1407.56        | <.0001  |
| Age                                                              | -42.66361          | 18.28032       | 0.0197  |
| Year                                                             | 79.2859            | 33.23636       | 0.0171  |
| <b>Chemotherapy – cancer attributable cost model</b>             |                    |                |         |
| Intercept                                                        | 9823.1724          | 1731.0318      | <.0001  |
| Age                                                              | -57.10611          | 22.89214       | 0.0127  |
| Year                                                             | 136.47376          | 36.82994       | 0.0002  |

# Linear regression models – continued

*Continued* – INITIAL PHASE: Stage III NSCLC

| Parameter                                                      | Parameter Estimate | Standard error | P-value |
|----------------------------------------------------------------|--------------------|----------------|---------|
| <b>Best supportive care – patient liability cost model</b>     |                    |                |         |
| Intercept                                                      | 311.60952          | 15.65874       | <.0001  |
| Year                                                           | -5.74915           | 2.58647        | 0.0263  |
| <b>Chemotherapy + radiation – patient liability cost model</b> |                    |                |         |
| Intercept                                                      | 1977.47776         | 177.6522       | <.0001  |
| Year                                                           | -19.775            | 3.53398        | <.0001  |
| Age                                                            | -7.03968           | 2.39354        | 0.0033  |
| <b>Surgery – patient liability cost model</b>                  |                    |                |         |
| Intercept                                                      | 176.24165          | 41.053         | <.0001  |
| Year                                                           | 16.78235           | 7.09421        | 0.0181  |
| <b>Radiation – patient liability cost model</b>                |                    |                |         |
| Intercept                                                      | 1493.26156         | 197.5366       | <.0001  |
| Year                                                           | -19.931            | 4.66438        | <.0001  |
| Age                                                            | -5.89452           | 2.56546        | 0.0217  |
| <b>Chemotherapy – patient liability cost model</b>             |                    |                |         |
| Intercept                                                      | 1631.81243         | 235.4783       | <.0001  |
| Year                                                           | 11.57264           | 5.01011        | 0.021   |
| Age                                                            | -8.98038           | 3.1141         | 0.004   |

# Linear regression models – continued

## INITIAL PHASE: Stage IV NSCLC

| Parameter                                          | Parameter Estimate | Standard error | P-value |
|----------------------------------------------------|--------------------|----------------|---------|
| <b>Best supportive care – total cost model</b>     |                    |                |         |
| Intercept                                          | 6361.6374          | 1522.3681      | <.0001  |
| Age                                                | -35.00087          | 19.02618       | 0.066   |
| <b>Radiation – total cost model</b>                |                    |                |         |
| Intercept                                          | 13873              | 1796.9427      | <.0001  |
| Age                                                | -109.67561         | 23.12079       | <.0001  |
| <b>Chemotherapy + radiation – total cost model</b> |                    |                |         |
| Intercept                                          | 11030              | 1154.8012      | <.0001  |
| Age                                                | -65.83239          | 15.6061        | <.0001  |
| Year                                               | 136.33155          | 24.08269       | <.0001  |
| <b>Chemotherapy – total cost model</b>             |                    |                |         |
| Intercept                                          | 5361.2644          | 240.44971      | <.0001  |
| Year                                               | 108.07336          | 39.8926        | 0.0068  |

| Parameter                                                        | Parameter Estimate | Standard error | P-value |
|------------------------------------------------------------------|--------------------|----------------|---------|
| <b>Best supportive care – cancer attributable cost model</b>     |                    |                |         |
| Intercept                                                        | 5772.6898          | 1554.5199      | 0.0002  |
| Age                                                              | -39.73328          | 19.428         | 0.041   |
| <b>Radiation – cancer attributable cost model</b>                |                    |                |         |
| Intercept                                                        | 13068              | 1801.4773      | <.0001  |
| Age                                                              | -109.54642         | 23.17914       | <.0001  |
| <b>Chemotherapy + radiation – cancer attributable cost model</b> |                    |                |         |
| Intercept                                                        | 11210              | 1161.4943      | <.0001  |
| Age                                                              | -73.06838          | 15.69655       | <.0001  |
| Year                                                             | 128.94812          | 24.22227       | <.0001  |
| <b>Chemotherapy – cancer attributable cost model</b>             |                    |                |         |
| Intercept                                                        | 4842.4092          | 247.92291      | <.0001  |
| Year                                                             | 116.63074          | 41.13246       | 0.0046  |

# Linear regression models – continued

## *Continued* – INITIAL PHASE: Stage IV NSCLC

| Parameter                                                      | Parameter Estimate | Standard error | P-value |
|----------------------------------------------------------------|--------------------|----------------|---------|
| <b>Best supportive care – patient liability cost</b>           |                    |                |         |
| No significant predictors. SD =708                             |                    |                |         |
| <b>Radiation – patient liability cost model</b>                |                    |                |         |
| Intercept                                                      | 847.68797          | 38.8699        | <.0001  |
| Year                                                           | -18.73896          | 5.56347        | 0.0008  |
| <b>Chemotherapy + radiation – patient liability cost model</b> |                    |                |         |
| Intercept                                                      | 2036.01275         | 166.6246       | <.0001  |
| Age                                                            | -12.10445          | 2.25292        | <.0001  |
| <b>Chemotherapy – patient liability cost model</b>             |                    |                |         |
| Intercept                                                      | 1670.63711         | 247.662        | <.0001  |
| Age                                                            | -10.41769          | 3.28805        | 0.0016  |

# Linear regression models – continued

## INITIAL PHASE: Limited Stage SCLC

| Parameter                                          | Parameter Estimate | Standard error | P-value |
|----------------------------------------------------|--------------------|----------------|---------|
| <b>Best supportive care – total cost</b>           |                    |                |         |
| No significant predictors. SD=4128                 |                    |                |         |
| <b>Chemotherapy – total cost</b>                   |                    |                |         |
| No significant predictors. SD=8388                 |                    |                |         |
| <b>Radiation – total cost</b>                      |                    |                |         |
| Intercept                                          | 9723.86535         | 1567.9495      | <.0001  |
| Age                                                | -59.93773          | 20.29881       | 0.0032  |
| <b>Chemotherapy + radiation – total cost model</b> |                    |                |         |
| Intercept                                          | 10278              | 1240.6262      | <.0001  |
| Age                                                | -40.6714           | 16.75188       | 0.0152  |
| Year                                               | 68.57056           | 27.04152       | 0.0113  |

| Parameter                                                        | Parameter Estimate | Standard error | P-value |
|------------------------------------------------------------------|--------------------|----------------|---------|
| <b>Best supportive care – cancer attributable cost model</b>     |                    |                |         |
| No significant predictors. SD=4214                               |                    |                |         |
| <b>Chemotherapy – cancer attributable cost</b>                   |                    |                |         |
| No significant predictors. SD=8409                               |                    |                |         |
| <b>Radiation – cancer attributable cost model</b>                |                    |                |         |
| Intercept                                                        | 9046.379           | 1665.0152      | <.0001  |
| Age                                                              | -62.35797          | 21.55543       | 0.0039  |
| <b>Chemotherapy + radiation – cancer attributable cost model</b> |                    |                |         |
| Intercept                                                        | 10435              | 1228.8451      | <.0001  |
| Age                                                              | -43.87048          | 16.63906       | 0.0084  |

| Parameter                                                      | Parameter Estimate | Standard error | P-value |
|----------------------------------------------------------------|--------------------|----------------|---------|
| <b>Best supportive care – patient liability cost</b>           |                    |                |         |
| No significant predictors. SD=540                              |                    |                |         |
| <b>Chemotherapy – patient liability cost</b>                   |                    |                |         |
| No significant predictors. SD=766                              |                    |                |         |
| <b>Radiation – patient liability cost model</b>                |                    |                |         |
| Intercept                                                      | 1481.46782         | 210.3441       | <.0001  |
| Age                                                            | -5.63685           | 2.7324         | 0.0393  |
| Year                                                           | -29.75461          | 5.71717        | <.0001  |
| <b>Chemotherapy + radiation – patient liability cost model</b> |                    |                |         |
| Intercept                                                      | 1414.90569         | 24.89743       | <.0001  |
| Year                                                           | -14.11301          | 3.93173        | 0.0003  |

# Linear regression models – continued

## INITIAL PHASE: Extensive Stage SCLC

| Parameter                                          | Parameter Estimate | Standard error | P-value |
|----------------------------------------------------|--------------------|----------------|---------|
| <b>Best supportive care – total cost</b>           |                    |                |         |
| No significant predictors. SD=4559                 |                    |                |         |
| <b>Chemotherapy – total cost</b>                   |                    |                |         |
| No significant predictors. SD=5577                 |                    |                |         |
| <b>Chemotherapy + radiation – total cost model</b> |                    |                |         |
| Intercept                                          | 10236              | 1387.7313      | <.0001  |
| Age                                                | -39.80772          | 18.88992       | 0.0351  |

| Parameter                                                        | Parameter Estimate | Standard error | P-value |
|------------------------------------------------------------------|--------------------|----------------|---------|
| <b>Best supportive care – cancer attributable cost</b>           |                    |                |         |
| No significant predictors. SD=4664                               |                    |                |         |
| <b>Chemotherapy – cancer attributable cost</b>                   |                    |                |         |
| No significant predictors. SD=5669                               |                    |                |         |
| <b>Chemotherapy + radiation – cancer attributable cost model</b> |                    |                |         |
| Intercept                                                        | 9942.2633          | 1396.6546      | <.0001  |
| Age                                                              | -41.31837          | 19.01138       | 0.0298  |

| Parameter                                                      | Parameter Estimate | Standard error | P-value |
|----------------------------------------------------------------|--------------------|----------------|---------|
| <b>Best supportive care – patient liability cost model</b>     |                    |                |         |
| Intercept                                                      | -2116.23535        | 880.3347       | 0.0167  |
| Age                                                            | 32.82355           | 11.45453       | 0.0044  |
| Year                                                           | 324.67255          | 144.6434       | 0.0254  |
| Age*year interaction                                           | -4.35144           | 1.88016        | 0.0212  |
| <b>Chemotherapy – patient liability cost model</b>             |                    |                |         |
| Intercept                                                      | 1065.67125         | 45.70393       | <.0001  |
| Year                                                           | -17.50649          | 8.36892        | 0.0367  |
| <b>Chemotherapy + radiation – patient liability cost model</b> |                    |                |         |
| Intercept                                                      | 1713.03673         | 185.8473       | <.0001  |
| Age                                                            | -6.84376           | 2.51997        | 0.0066  |
| Year                                                           | -10.32031          | 3.95308        | 0.0091  |



# Linear regression models – continued

## CONTINUING PHASE: Stage I, II NSCLC

| Parameter                                      | Parameter Estimate | Standard error | P-value |
|------------------------------------------------|--------------------|----------------|---------|
| <b>Best supportive care – total cost model</b> |                    |                |         |
| Intercept                                      | 1813.7369          | 109.10296      | <.0001  |
| Year                                           | 51.50683           | 14.92613       | 0.0006  |
| <b>Surgery – total cost model</b>              |                    |                |         |
| Intercept                                      | 1268.01941         | 39.21853       | <.0001  |
| Year                                           | 35.37497           | 5.06031        | <.0001  |
| <b>Radiation – total cost model</b>            |                    |                |         |
| Intercept                                      | 5576.61908         | 754.71481      | <.0001  |
| Year                                           | 42.48555           | 16.1346        | 0.0085  |
| Age                                            | -45.62408          | 9.8029         | <.0001  |

| Parameter                                                    | Parameter Estimate | Standard error | P-value |
|--------------------------------------------------------------|--------------------|----------------|---------|
| <b>Best supportive care – cancer attributable cost model</b> |                    |                |         |
| Intercept                                                    | 1223.4874          | 113.16126      | <.0001  |
| Year                                                         | 31.75026           | 15.48133       | 0.0403  |
| <b>Surgery – cancer attributable cost model</b>              |                    |                |         |
| Intercept                                                    | 814.33504          | 42.16681       | <.0001  |
| Year                                                         | 31.11871           | 5.44073        | <.0001  |
| <b>Radiation – cancer attributable cost model</b>            |                    |                |         |
| Intercept                                                    | 3640.6578          | 785.71942      | <.0001  |
| Age                                                          | -28.11105          | 10.1961        | 0.0059  |

| Parameter                                                  | Parameter Estimate | Standard error | P-value |
|------------------------------------------------------------|--------------------|----------------|---------|
| <b>Best supportive care – patient liability cost model</b> |                    |                |         |
| Intercept                                                  | 204.31403          | 12.0452        | <.0001  |
| Year                                                       | 4.38181            | 1.64788        | 0.0079  |
| <b>Surgery – patient liability cost model</b>              |                    |                |         |
| Intercept                                                  | 157.16846          | 4.91022        | <.0001  |
| Year                                                       | 4.97638            | 0.63356        | <.0001  |
| <b>Radiation – patient liability cost model</b>            |                    |                |         |
| Intercept                                                  | 633.67088          | 82.73414       | <.0001  |
| Year                                                       | 6.14428            | 1.76872        | 0.0005  |
| Age                                                        | -5.2965            | 1.07462        | <.0001  |

# Linear regression models – continued

## CONTINUING PHASE: Stage III NSCLC

| Parameter                                          | Parameter Estimate | Standard error | P-value |
|----------------------------------------------------|--------------------|----------------|---------|
| <b>Best supportive care – total cost model</b>     |                    |                |         |
| Intercept                                          | 4803.26833         | 862.30367      | <.0001  |
| Year                                               | 86.7937            | 20.12103       | <.0001  |
| Age                                                | -35.16769          | 11.38563       | 0.002   |
| <b>Chemotherapy – total cost model</b>             |                    |                |         |
| Intercept                                          | 11328              | 1595.6532      | <.0001  |
| Year                                               | 171.88066          | 33.94188       | <.0001  |
| Age                                                | -113.36235         | 21.60077       | <.0001  |
| <b>Radiation – total cost model</b>                |                    |                |         |
| Intercept                                          | 6667.00444         | 1102.4165      | <.0001  |
| Year                                               | 73.45774           | 24.79273       | 0.0031  |
| Age                                                | -57.24448          | 14.73385       | 0.0001  |
| <b>Chemotherapy + radiation – total cost model</b> |                    |                |         |
| No significant predictors. SD=4055                 |                    |                |         |
| <b>Surgery – total cost model</b>                  |                    |                |         |
| Intercept                                          | 1451.37557         | 138.21613      | <.0001  |
| Year                                               | 77.05078           | 19.04548       | <.0001  |

| Parameter                                                        | Parameter Estimate | Standard error | P-value |
|------------------------------------------------------------------|--------------------|----------------|---------|
| <b>Best supportive care – cancer attributable cost model</b>     |                    |                |         |
| Intercept                                                        | 4619.7225          | 910.58189      | <.0001  |
| Year                                                             | 89.18294           | 21.24755       | <.0001  |
| Age                                                              | -41.04207          | 12.02308       | 0.0007  |
| <b>Chemotherapy – cancer attributable cost model</b>             |                    |                |         |
| Intercept                                                        | 10131              | 1655.0483      | <.0001  |
| Year                                                             | 164.35349          | 35.2053        | <.0001  |
| Age                                                              | -102.41618         | 22.40482       | <.0001  |
| <b>Radiation – cancer attributable cost model</b>                |                    |                |         |
| Intercept                                                        | 6109.7707          | 1134.2489      | <.0001  |
| Year                                                             | 55.57757           | 25.50862       | 0.0295  |
| Age                                                              | -56.97012          | 15.15929       | 0.0002  |
| <b>Chemotherapy + radiation – cancer attributable cost model</b> |                    |                |         |
| No significant predictors. SD=4137                               |                    |                |         |
| <b>Surgery – cancer attributable cost model</b>                  |                    |                |         |
| Intercept                                                        | 1149.9053          | 138.93642      | <.0001  |
| Year                                                             | 59.82852           | 19.14474       | 0.0018  |

# Linear regression models – continued

*Continued* – CONTINUING PHASE: Stage III NSCLC

| Parameter                                                      | Parameter Estimate | Standard error | P-value |
|----------------------------------------------------------------|--------------------|----------------|---------|
| <b>Best supportive care – patient liability cost model</b>     |                    |                |         |
| Intercept                                                      | 817.50656          | 113.2859       | <.0001  |
| Year                                                           | 11.33972           | 2.64342        | <.0001  |
| Age                                                            | -7.33845           | 1.4958         | <.0001  |
| <b>Chemotherapy – patient liability cost model</b>             |                    |                |         |
| Intercept                                                      | 1833.58161         | 232.5926       | <.0001  |
| Year                                                           | 18.77798           | 4.94758        | 0.0002  |
| Age                                                            | -17.94934          | 3.14867        | <.0001  |
| <b>Radiation – patient liability cost model</b>                |                    |                |         |
| Intercept                                                      | 954.76425          | 127.5967       | <.0001  |
| Age                                                            | -8.95092           | 1.70534        | <.0001  |
| Year                                                           | 11.06002           | 2.86958        | 0.0001  |
| <b>Chemotherapy + radiation – patient liability cost model</b> |                    |                |         |
| Intercept                                                      | 884.78392          | 114.4295       | <.0001  |
| Age                                                            | -6.90615           | 1.5605         | <.0001  |
| <b>Surgery – patient liability cost model</b>                  |                    |                |         |
| Intercept                                                      | 190.09341          | 15.87735       | <.0001  |
| Year                                                           | 9.80532            | 2.18782        | <.0001  |

# Linear regression models – continued

## CONTINUING PHASE: Stage IV NSCLC

| Parameter                                          | Parameter Estimate | Standard error | P-value |
|----------------------------------------------------|--------------------|----------------|---------|
| <b>Best supportive care – total cost model</b>     |                    |                |         |
| Intercept                                          | 1703.25028         | 215.49493      | <.0001  |
| Year                                               | 75.27901           | 30.34411       | 0.0133  |
| <b>Chemotherapy – total cost model</b>             |                    |                |         |
| Intercept                                          | 7265.35748         | 1392.1704      | <.0001  |
| Year                                               | 118.79797          | 31.4403        | 0.0002  |
| Age                                                | -55.65882          | 18.91564       | 0.0033  |
| <b>Chemotherapy + radiation – total cost model</b> |                    |                |         |
| Intercept                                          | 304.08443          | 2227.2017      | 0.8914  |
| Year                                               | 1063.73674         | 274.08526      | 0.0001  |
| Age                                                | 41.92552           | 30.79338       | 0.1734  |
| Age*year interaction                               | -12.72415          | 3.76833        | 0.0007  |
| <b>Radiation – total cost model</b>                |                    |                |         |
| Intercept                                          | 7571.70278         | 1355.4688      | <.0001  |
| Age                                                | -64.11512          | 17.79911       | 0.0003  |

| Parameter                                                        | Parameter Estimate | Standard error | P-value |
|------------------------------------------------------------------|--------------------|----------------|---------|
| <b>Best supportive care – cancer attributable cost model</b>     |                    |                |         |
| No significant predictors. SD=3534                               |                    |                |         |
| <b>Chemotherapy – cancer attributable cost model</b>             |                    |                |         |
| Intercept                                                        | 6975.6669          | 1503.1132      | <.0001  |
| Year                                                             | 132.30799          | 33.9458        | 0.0001  |
| Age                                                              | -58.8683           | 20.42304       | 0.004   |
| <b>Chemotherapy + radiation – cancer attributable cost model</b> |                    |                |         |
| Intercept                                                        | 938.09597          | 2251.8469      | 0.677   |
| Year                                                             | 993.26282          | 277.11815      | 0.0003  |
| Age                                                              | 28.19398           | 31.13413       | 0.3652  |
| Age*year interaction                                             | -11.8144           | 3.81003        | 0.0019  |
| <b>Radiation – cancer attributable cost model</b>                |                    |                |         |
| Intercept                                                        | 6067.0519          | 1406.2242      | <.0001  |
| Age                                                              | -55.23009          | 18.46559       | 0.0028  |

# Linear regression models – continued

## *Continued* – CONTINUING PHASE: Stage IV NSCLC

| Parameter                                                | Parameter Estimate | Standard error | P-value |
|----------------------------------------------------------|--------------------|----------------|---------|
| <b>Best supportive care – patient liability cost</b>     |                    |                |         |
| No significant predictors. SD=423                        |                    |                |         |
| <b>Chemotherapy – patient liability cost</b>             |                    |                |         |
| Intercept                                                | 1336.76785         | 206.8615       | <.0001  |
| Year                                                     | 15.38007           | 4.67169        | 0.001   |
| Age                                                      | -11.18087          | 2.81066        | <.0001  |
| <b>Chemotherapy + radiation – patient liability cost</b> |                    |                |         |
| Intercept                                                | 554.00704          | 360.148        | 0.1241  |
| Year                                                     | 129.74238          | 44.32075       | 0.0034  |
| Age                                                      | 0.10585            | 4.97942        | 0.983   |
| Age*year interaction                                     | -1.50974           | 0.60935        | 0.0133  |
| <b>Radiation – patient liability cost</b>                |                    |                |         |
| Intercept                                                | 881.52484          | 172.5596       | <.0001  |
| Age                                                      | -7.61986           | 2.26594        | 0.0008  |

# Linear regression models – continued

## CONTINUING PHASE: Limited Stage SCLC

| Parameter                                          | Parameter Estimate | Standard error | P-value |
|----------------------------------------------------|--------------------|----------------|---------|
| <b>Best supportive care – total cost</b>           |                    |                |         |
| No significant predictors. SD=3396                 |                    |                |         |
| <b>Chemotherapy – total cost model</b>             |                    |                |         |
| Intercept                                          | 8494.87995         | 1661.5085      | <.0001  |
| Year                                               | 111.6406           | 40.52735       | 0.006   |
| Age                                                | -73.05553          | 22.65153       | 0.0013  |
| <b>Radiation – total cost model</b>                |                    |                |         |
| Intercept                                          | 5462.7329          | 1108.3962      | <.0001  |
| Year                                               | 69.31795           | 28.30658       | 0.0144  |
| Age                                                | -43.64771          | 14.91216       | 0.0035  |
| <b>Chemotherapy + radiation – total cost model</b> |                    |                |         |
| Intercept                                          | 959.16759          | 1788.7597      | 0.5918  |
| Year                                               | 531.2286           | 236.20483      | 0.0246  |
| Age                                                | 22.77697           | 24.73902       | 0.3573  |
| Year*age interaction                               | -7.20547           | 3.24035        | 0.0262  |

| Parameter                                                        | Parameter Estimate | Standard error | P-value |
|------------------------------------------------------------------|--------------------|----------------|---------|
| <b>Best supportive care – cancer attributable cost</b>           |                    |                |         |
| No significant predictors. SD=3614                               |                    |                |         |
| <b>Chemotherapy – cancer attributable cost model</b>             |                    |                |         |
| Intercept                                                        | 8778.4485          | 1674.4618      | <.0001  |
| Year                                                             | 106.96173          | 40.8433        | 0.009   |
| Age                                                              | -82.51379          | 22.82812       | 0.0003  |
| <b>Radiation – cancer attributable cost</b>                      |                    |                |         |
| No significant predictors. SD=4194                               |                    |                |         |
| <b>Chemotherapy + radiation – cancer attributable cost model</b> |                    |                |         |
| Intercept                                                        | 4083.6542          | 803.92827      | <.0001  |
| Age                                                              | -24.93408          | 11.03601       | 0.0239  |

| Parameter                                                  | Parameter Estimate | Standard error | P-value |
|------------------------------------------------------------|--------------------|----------------|---------|
| <b>Best supportive care – patient liability cost model</b> |                    |                |         |
| Intercept                                                  | 893.80226          | 147.9069       | <.0001  |
| Age                                                        | -7.64277           | 1.96143        | 0.0001  |
| <b>Chemotherapy – patient liability cost model</b>         |                    |                |         |
| Intercept                                                  | 1644.13677         | 279.228        | <.0001  |
| Age                                                        | -14.39425          | 3.7966         | 0.0002  |
| <b>Radiation – patient liability cost model</b>            |                    |                |         |
| Intercept                                                  | 1040.04627         | 148.6809       | <.0001  |
| Age                                                        | -9.36982           | 1.96686        | <.0001  |
| <b>Chemotherapy + radiation – patient liability cost</b>   |                    |                |         |
| Intercept                                                  | 991.06495          | 111.6905       | <.0001  |
| Age                                                        | -8.44028           | 1.53324        | <.0001  |

# Linear regression models – continued

## CONTINUING PHASE: Extensive Stage SCLC

| Parameter                                          | Parameter Estimate | Standard error | P-value |
|----------------------------------------------------|--------------------|----------------|---------|
| <b>Best supportive care – total cost</b>           |                    |                |         |
| No significant predictors. SD=3134                 |                    |                |         |
| <b>Chemotherapy – total cost</b>                   |                    |                |         |
| No significant predictors. SD=3790                 |                    |                |         |
| <b>Chemotherapy + radiation – total cost model</b> |                    |                |         |
| Intercept                                          | 7279.22214         | 1195.4421      | <.0001  |
| Year                                               | 74.64834           | 27.40092       | 0.0065  |
| Age                                                | -51.12285          | 16.52517       | 0.002   |

| Parameter                                                        | Parameter Estimate | Standard error | P-value |
|------------------------------------------------------------------|--------------------|----------------|---------|
| <b>Best supportive care – cancer attributable cost</b>           |                    |                |         |
| No significant predictors. SD=3626                               |                    |                |         |
| <b>Chemotherapy – cancer attributable cost</b>                   |                    |                |         |
| No significant predictors. SD=4040                               |                    |                |         |
| <b>Chemotherapy + radiation – cancer attributable cost model</b> |                    |                |         |
| Intercept                                                        | 7281.5117          | 1223.7017      | <.0001  |
| Year                                                             | 59.87339           | 28.04866       | 0.0329  |
| Age                                                              | -55.07376          | 16.91582       | 0.0011  |

| Parameter                                                      | Parameter Estimate | Standard error | P-value |
|----------------------------------------------------------------|--------------------|----------------|---------|
| <b>Best supportive care – patient liability cost model</b>     |                    |                |         |
| Intercept                                                      | -559.21914         | 380.9801       | 0.1435  |
| Age                                                            | 10.06246           | 4.97784        | 0.0444  |
| <b>Chemotherapy – patient liability cost model</b>             |                    |                |         |
| Intercept                                                      | 1388.25038         | 332.699        | <.0001  |
| Age                                                            | -10.58672          | 4.52229        | 0.0196  |
| <b>Chemotherapy + radiation – patient liability cost model</b> |                    |                |         |
| Intercept                                                      | 1381.47033         | 201.488        | <.0001  |
| Age                                                            | -9.67808           | 2.78571        | 0.0005  |

# Linear regression models – continued

## TERMINAL PHASE

| Parameter                                                                 | Parameter Estimate | Standard error | P-value |
|---------------------------------------------------------------------------|--------------------|----------------|---------|
| <b>Terminal phase total cost – lung cancer death model</b>                |                    |                |         |
| Intercept                                                                 | 24436              | 1000.5904      | <.0001  |
| Year                                                                      | 411.76653          | 141.68309      | 0.0037  |
| Age                                                                       | -148.32874         | 12.96255       | <.0001  |
| Age*year interaction                                                      | -6.77816           | 1.82769        | 0.0002  |
| <b>Terminal phase patient liability cost – lung cancer death model</b>    |                    |                |         |
| Intercept                                                                 | 2625.05227         | 71.40445       | <.0001  |
| Year                                                                      | 17.92041           | 10.11083       | 0.0763  |
| Age                                                                       | -18.25415          | 0.92504        | <.0001  |
| Age*year interaction                                                      | -0.41223           | 0.13043        | 0.0016  |
| <b>Terminal phase total cost – other cause of death model</b>             |                    |                |         |
| Intercept                                                                 | 38642              | 1177.6066      | <.0001  |
| Year                                                                      | -510.48039         | 26.45033       | <.0001  |
| Age                                                                       | -281.39361         | 14.9564        | <.0001  |
| <b>Terminal phase patient liability cost – other cause of death model</b> |                    |                |         |
| Intercept                                                                 | 2446.45154         | 163.21008      | <.0001  |
| Year                                                                      | 16.72101           | 19.28395       | 0.3859  |
| Age                                                                       | -14.62954          | 2.07771        | <.0001  |
| Year*Age interaction                                                      | -0.66203           | 0.24331        | 0.0065  |



# Linear regression models – Medicare Part D

## PREDIAGNOSIS PHASE

| Parameter                                              | Parameter Estimate | Standard error | P-value |
|--------------------------------------------------------|--------------------|----------------|---------|
| <b>Prediagnosis phase total cost model</b>             |                    |                |         |
| Intercept                                              | -174.346           | 6.88136        | <.0001  |
| Year                                                   | 48.56909           | 0.82392        | <.0001  |
| <b>Prediagnosis phase patient liability cost model</b> |                    |                |         |
| Intercept                                              | -24.1497           | 21.73472       | 0.2665  |
| Age                                                    | -0.07813           | 0.29075        | 0.7882  |
| Year                                                   | 1.64319            | 2.55301        | 0.5198  |
| Age*year interaction                                   | 0.09679            | 0.03405        | 0.0045  |

## SURGERY PHASE

| Parameter                                         | Parameter Estimate | Standard error | P-value |
|---------------------------------------------------|--------------------|----------------|---------|
| <b>Surgery phase total cost model</b>             |                    |                |         |
| Intercept                                         | 186.4278           | 79.34285       | 0.0188  |
| Age                                               | -3.83333           | 1.06231        | 0.0003  |
| Year                                              | 40.34639           | 1.79771        | <.0001  |
| <b>Surgery phase patient liability cost model</b> |                    |                |         |
| Intercept                                         | 40.09406           | 59.17966       | 0.4981  |
| Age                                               | -0.87332           | 0.79666        | 0.273   |
| Year                                              | -7.22134           | 8.33104        | 0.3861  |
| Age*year interaction                              | 0.23158            | 0.11173        | 0.0383  |

# Linear regression models – Medicare Part D

---

## STAGING PHASE

| Parameter                                 | Parameter Estimate | Standard error | P-value |
|-------------------------------------------|--------------------|----------------|---------|
| <b>Staging phase – total cost model</b>   |                    |                |         |
| Intercept                                 | -784.173           | 275.9306       | 0.0045  |
| Age                                       | 8.1012             | 3.6684         | 0.0272  |
| Year                                      | 175.8657           | 33.01341       | <.0001  |
| Age*year interaction                      | -1.49603           | 0.43824        | 0.0006  |
| <b>Staging phase – patient cost model</b> |                    |                |         |
| Intercept                                 | -201.584           | 82.62285       | 0.0147  |
| Age                                       | 2.3521             | 1.09844        | 0.0323  |
| Year                                      | 33.11238           | 9.88532        | 0.0008  |
| Age*year interaction                      | -0.28757           | 0.13122        | 0.0284  |

# Linear regression models – Medicare Part D

## INITIAL PHASE

| Parameter                                 | Parameter Estimate | Standard error | P-value |
|-------------------------------------------|--------------------|----------------|---------|
| <b>Initial phase – total cost model</b>   |                    |                |         |
| Intercept                                 | -203.852           | 75.45247       | 0.0069  |
| Age                                       | 2.38939            | 0.99584        | 0.0164  |
| Year                                      | 34.69896           | 2.17642        | <.0001  |
| <b>Initial phase – patient cost model</b> |                    |                |         |
| Intercept                                 | -26.0154           | 16.41424       | 0.113   |
| Age                                       | 0.52295            | 0.21664        | 0.0158  |
| Year                                      | 3.46622            | 0.47347        | <.0001  |

| Parameter                                                        | Parameter Estimate | Standard error | P-value |
|------------------------------------------------------------------|--------------------|----------------|---------|
| <b>Best supportive care – cancer attributable cost model</b>     |                    |                |         |
| Intercept                                                        | -956.587           | 278.0509       | 0.0006  |
| Age                                                              | 11.20547           | 3.5652         | 0.0017  |
| Year                                                             | 59.85245           | 9.48675        | <.0001  |
| <b>Surgery – cancer attributable cost model</b>                  |                    |                |         |
| Intercept                                                        | -7.64912           | 12.48877       | 0.5402  |
| Year                                                             | 13.45974           | 1.80028        | <.0001  |
| <b>Chemotherapy – cancer attributable cost model</b>             |                    |                |         |
| Intercept                                                        | -125.95            | 100.4879       | 0.2103  |
| Year                                                             | 58.84795           | 12.46009       | <.0001  |
| <b>Radiation – cancer attributable cost model</b>                |                    |                |         |
| Intercept                                                        | 27.99345           | 58.18268       | 0.6305  |
| Year                                                             | 26.99789           | 6.9223         | <.0001  |
| <b>Chemotherapy + radiation – cancer attributable cost model</b> |                    |                |         |
| Intercept                                                        | -2.70958           | 46.51481       | 0.9535  |
| Year                                                             | 39.84879           | 5.52671        | <.0001  |

# Linear regression models – Medicare Part D

## CONTINUING PHASE

| Parameter                                   | Parameter Estimate | Standard error | P-value |
|---------------------------------------------|--------------------|----------------|---------|
| <b>Continuing phase – total cost model</b>  |                    |                |         |
| Intercept                                   | -2431.74           | 65.75906       | <.0001  |
| Year                                        | 224.3076           | 6.41873        | <.0001  |
| Age                                         | 35.78862           | 0.94744        | <.0001  |
| Age*year interaction                        | -3.16603           | 0.08833        | <.0001  |
| <b>Continuing phase –patient cost model</b> |                    |                |         |
| Intercept                                   | -425.704           | 10.52635       | <.0001  |
| Year                                        | 34.26401           | 1.02748        | <.0001  |
| Age                                         | 6.13502            | 0.15166        | <.0001  |
| Age*year interaction                        | -0.49233           | 0.01414        | <.0001  |

| Parameter                                                        | Parameter Estimate | Standard error | P-value |
|------------------------------------------------------------------|--------------------|----------------|---------|
| <b>Best supportive care – cancer attributable cost model</b>     |                    |                |         |
| Intercept                                                        | -2095.27           | 192.4757       | <.0001  |
| Year                                                             | 153.1495           | 19.96528       | <.0001  |
| Age                                                              | 30.35047           | 2.75869        | <.0001  |
| Age*year interaction                                             | -2.11181           | 0.27673        | <.0001  |
| <b>Surgery – cancer attributable cost model</b>                  |                    |                |         |
| Intercept                                                        | -2006.49           | 77.48267       | <.0001  |
| Year                                                             | 136.4654           | 8.14973        | <.0001  |
| Age                                                              | 29.68617           | 1.11573        | <.0001  |
| Age*year interaction                                             | -1.98611           | 0.11202        | <.0001  |
| <b>Chemotherapy – cancer attributable cost model</b>             |                    |                |         |
| Intercept                                                        | -3648.6            | 373.6447       | <.0001  |
| Year                                                             | 364.9317           | 35.58666       | <.0001  |
| Age                                                              | 54.37196           | 5.39693        | <.0001  |
| Age*year interaction                                             | -5.11135           | 0.48977        | <.0001  |
| <b>Radiation – cancer attributable cost model</b>                |                    |                |         |
| Intercept                                                        | -2217.87           | 173.6502       | <.0001  |
| Year                                                             | 176.4279           | 17.83697       | <.0001  |
| Age                                                              | 31.38004           | 2.50065        | <.0001  |
| Age*year interaction                                             | -2.48072           | 0.24781        | <.0001  |
| <b>Chemotherapy + radiation – cancer attributable cost model</b> |                    |                |         |
| Intercept                                                        | -3381.11           | 196.1774       | <.0001  |
| Year                                                             | 342.2106           | 17.62129       | <.0001  |
| Age                                                              | 50.29014           | 2.83261        | <.0001  |
| Age*year interaction                                             | -4.83965           | 0.24107        | <.0001  |

# Linear regression models – Medicare Part D

---

## TERMINAL PHASE

| Parameter                                  | Parameter Estimate | Standard error | P-value |
|--------------------------------------------|--------------------|----------------|---------|
| <b>Terminal phase – total cost model</b>   |                    |                |         |
| Intercept                                  | -291.03            | 472.7504       | 0.5382  |
| Age                                        | 9.49237            | 6.073          | 0.1181  |
| Year                                       | 184.8391           | 48.42188       | 0.0001  |
| Age*year interaction                       | -2.07166           | 0.62034        | 0.0008  |
| <b>Terminal phase – patient cost model</b> |                    |                |         |
| Intercept                                  | 210.0956           | 17.53507       | <.0001  |
| Age                                        | -0.52251           | 0.21186        | 0.0137  |
| Year                                       | -6.33767           | 0.78614        | <.0001  |
